# Supplementary figures and images for: ADF/cofilin-driven actin dynamics in early events ofLeishmaniacell division
Source: Oxford University Press journal article supplement (doi:10.1242/jcs.068494), 2010-05-12

Fig. S1

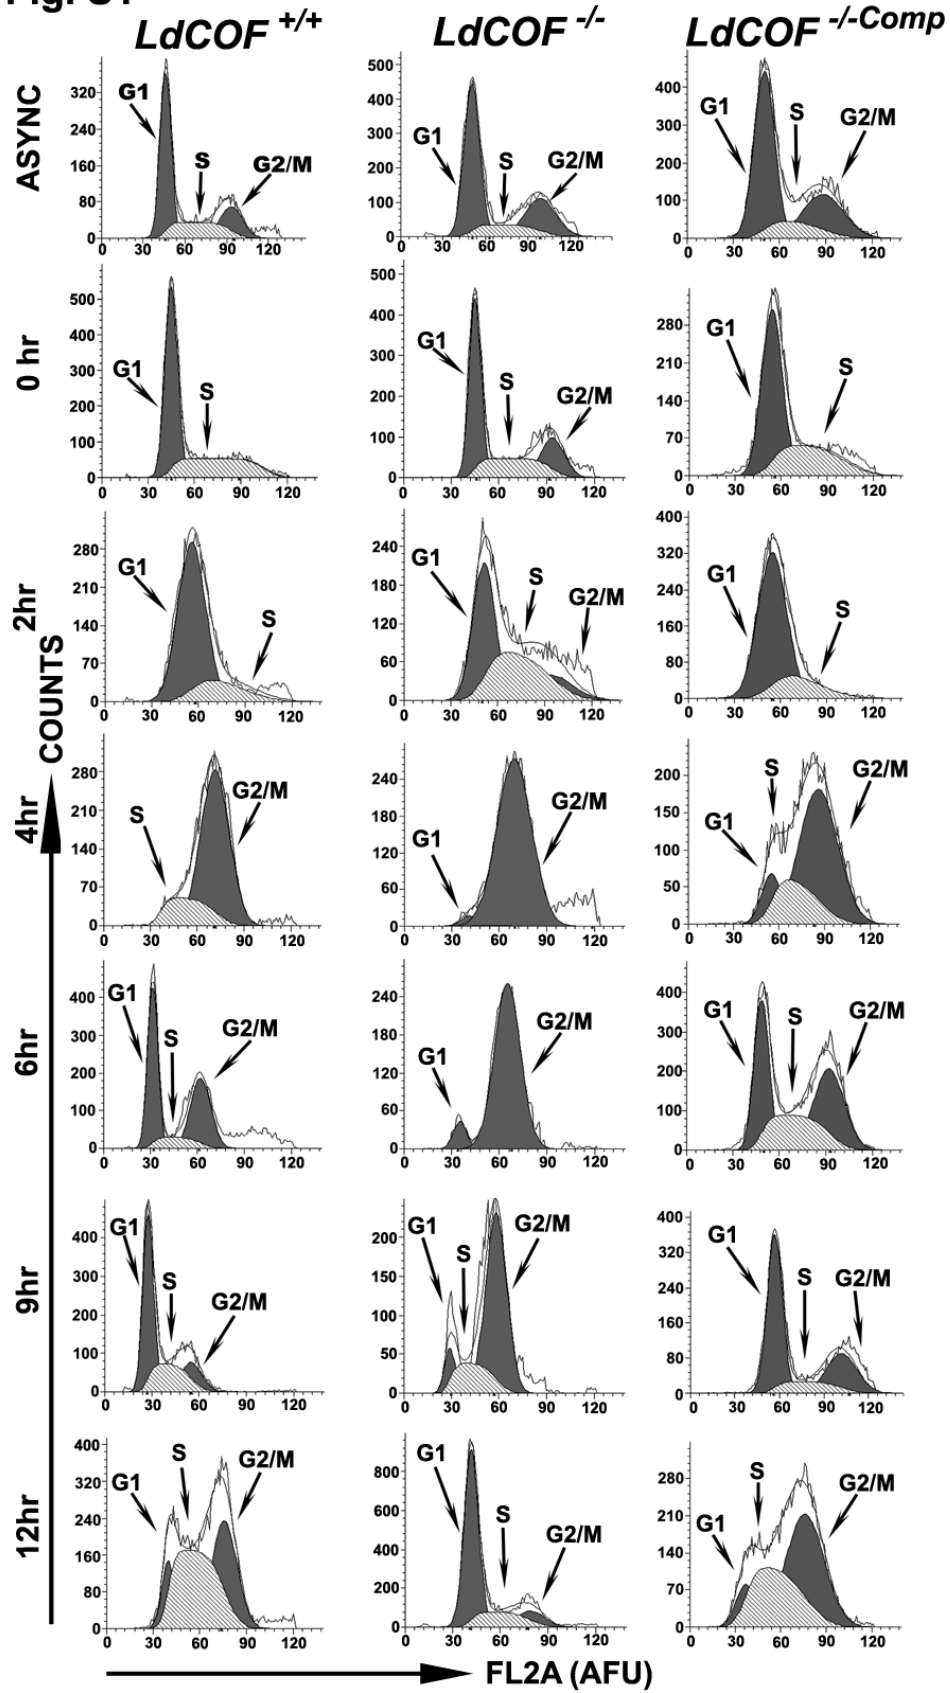

Supplement: jcs068494-sup-068494figs1.pdf [file jcs068494-sup-068494figs1.pdf]

Fig S2

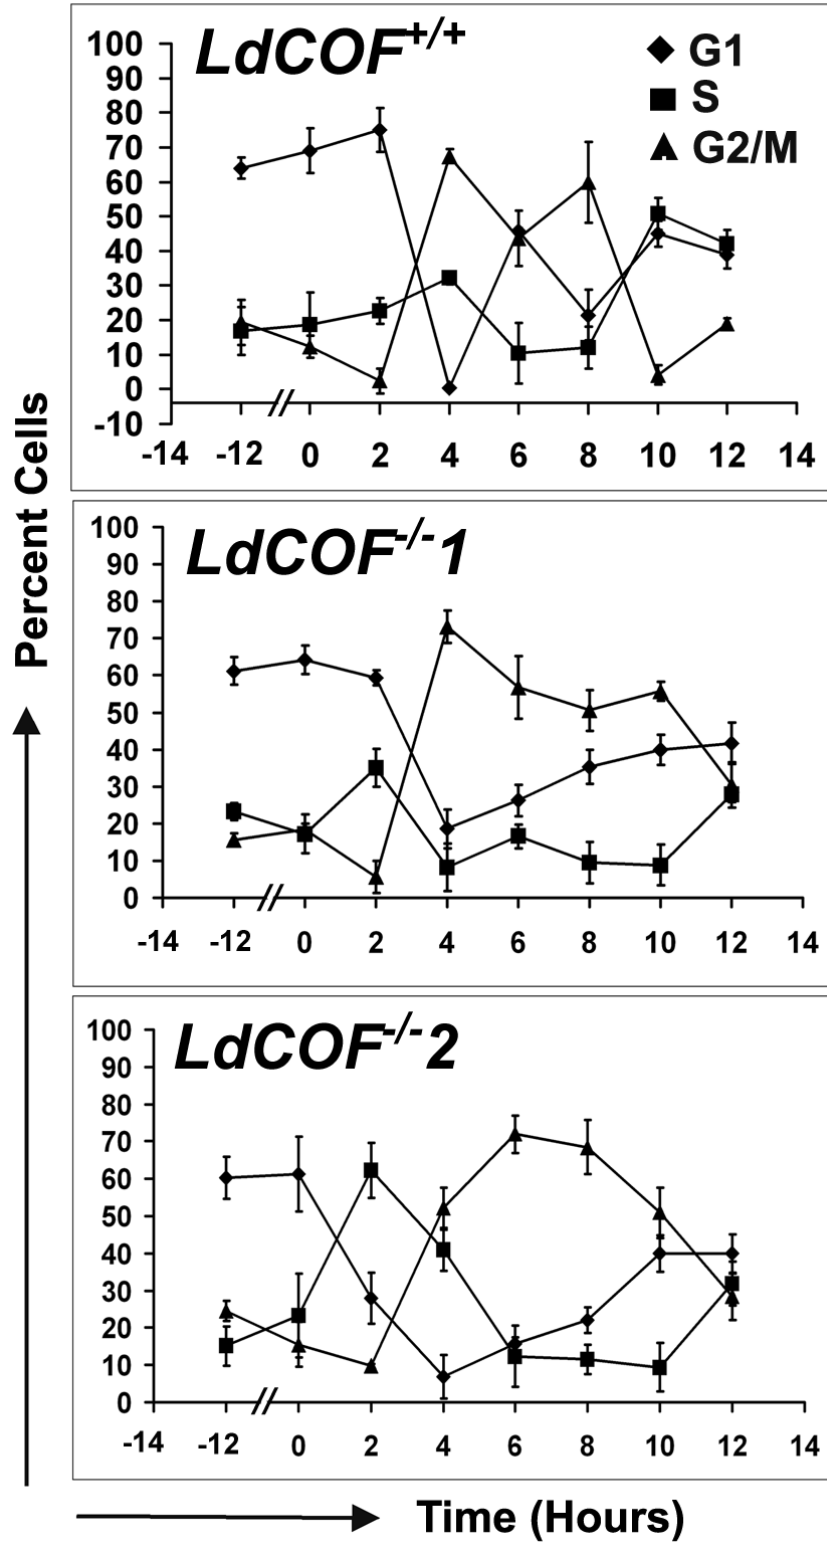

Supplement: jcs068494-sup-068494figs2.pdf [file jcs068494-sup-068494figs2.pdf]

**Fig. S3**

**A**

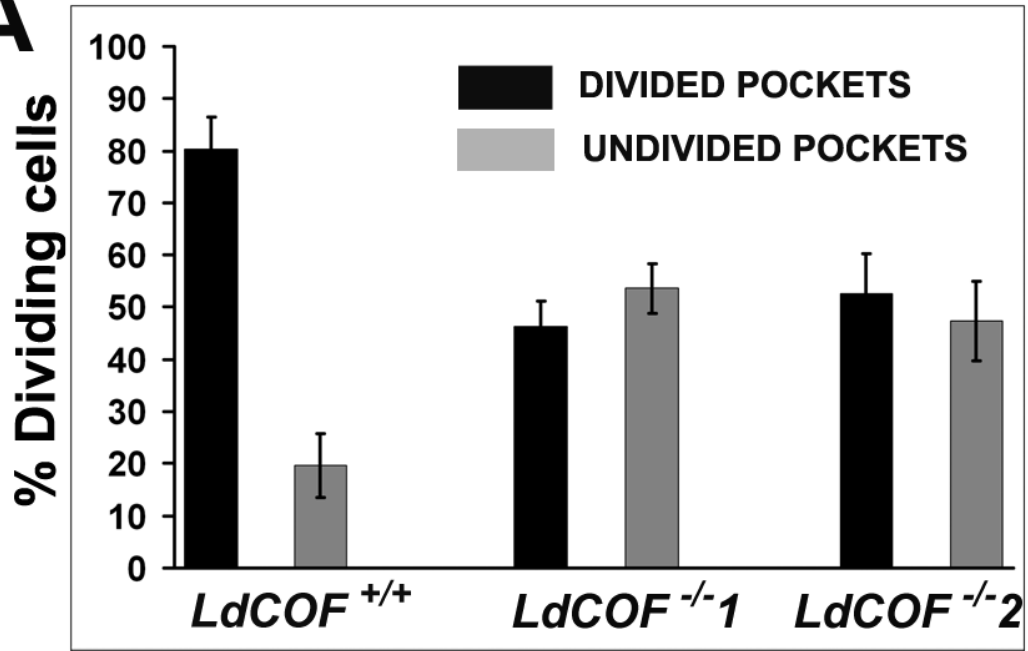

**B**

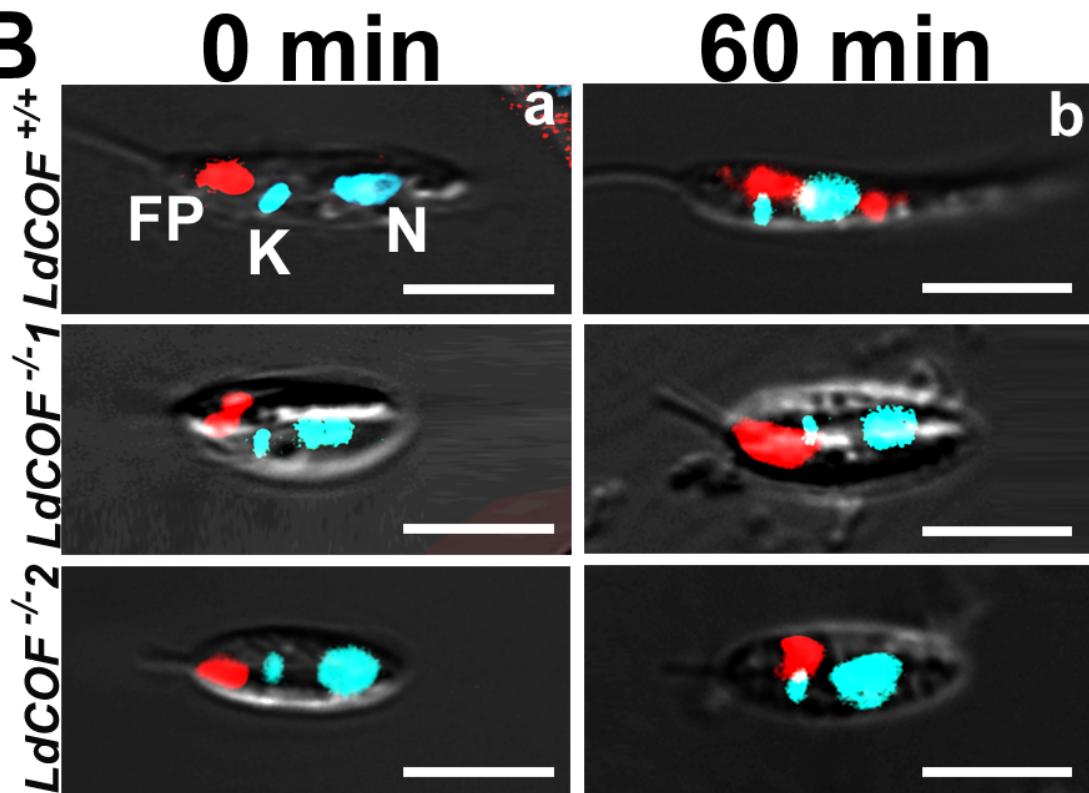

Supplement: jcs068494-sup-068494figs3.pdf [file jcs068494-sup-068494figs3.pdf]

**Fig. S4**

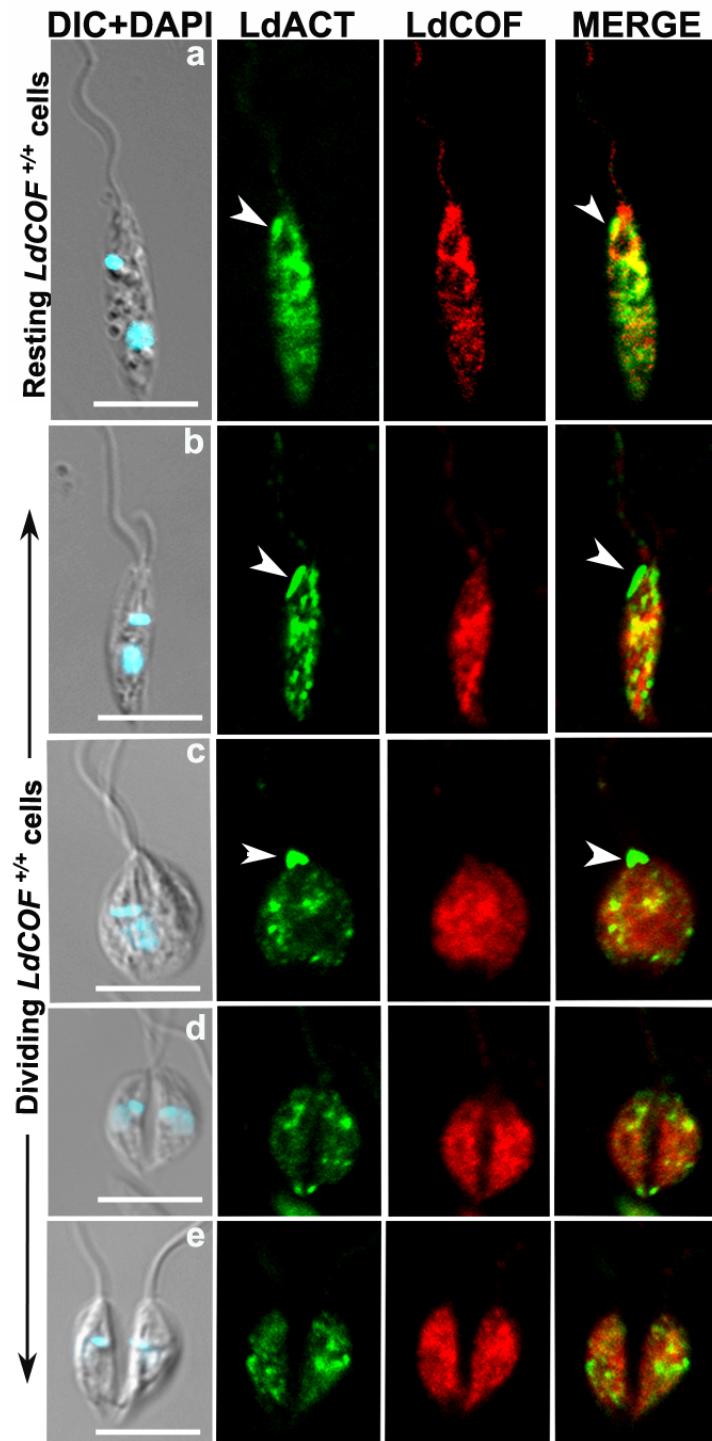

Supplement: jcs068494-sup-068494figs4.pdf [file jcs068494-sup-068494figs4.pdf]
